# Supplementary material for: Novel Divergent Members of the Kitrinoviricota Discovered through Metagenomics in the Intestinal Contents of Red-Backed Voles (Clethrionomys gapperi)
Source: MDPI journal article supplement (doi:10.3390/ijms24010131), 2022-12-21

**Supplementary Figure S1. Alignment of the RNA-directed RNA polymerase (RdRP) domain of close relatives of the vole-associated tomosvirus 1 (Va-TV-1).**

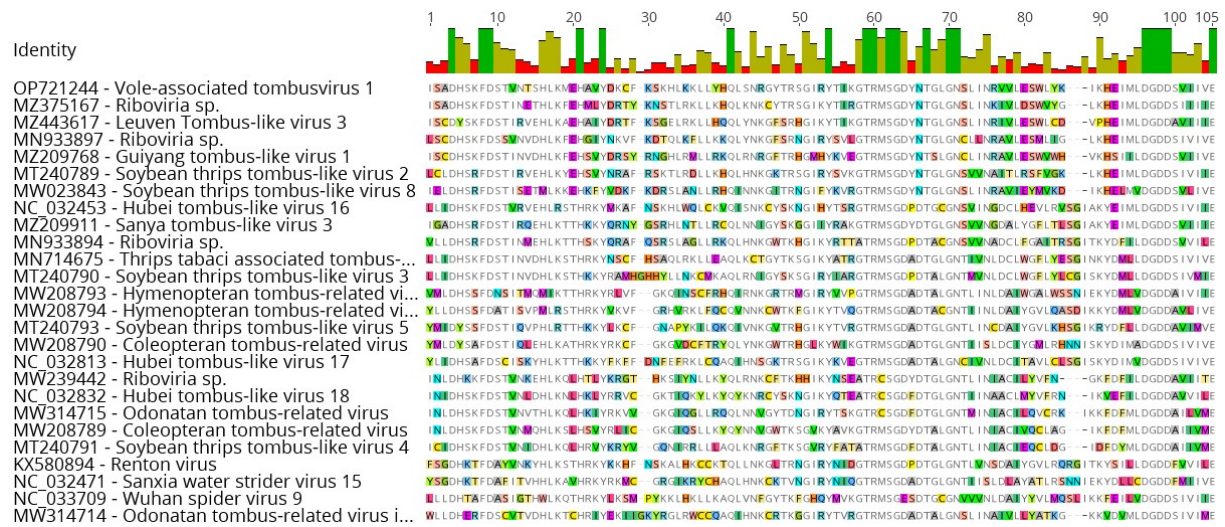

**Supplementary Figure S2. Alignment of the RNA-directed RNA polymerase (RdRP) domain of close relatives of the vole-associated deltaflexivirus 1 (Va-DFV-1).**

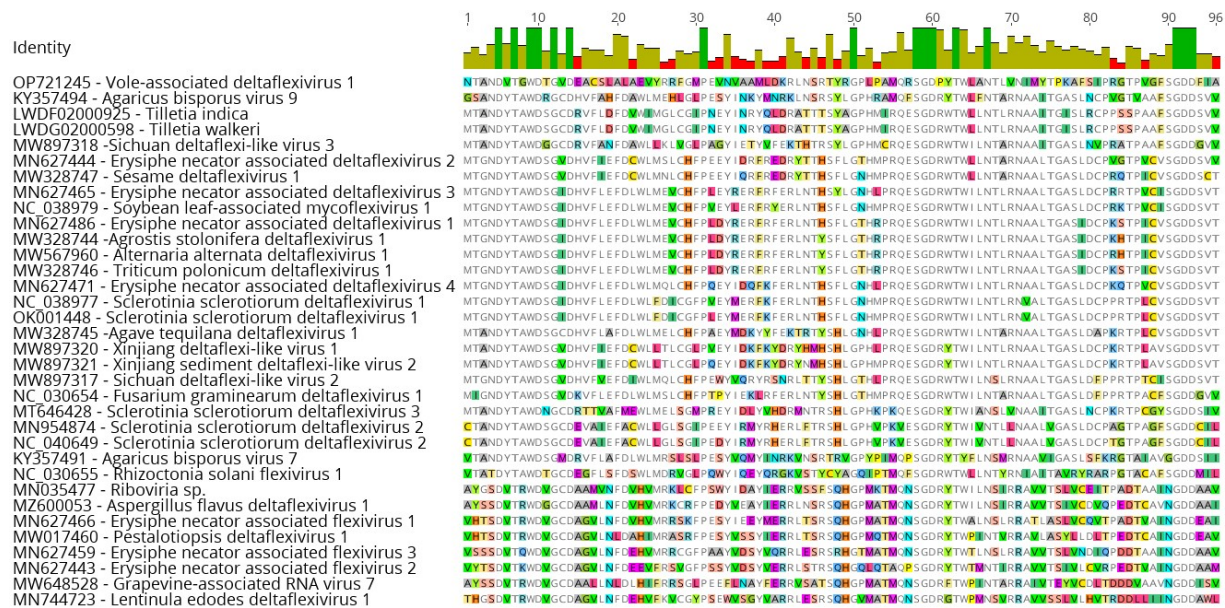

Supplement: s1 [file s1]
